# Supplementary material
Source: PubMed Central journal article supplement (PMC4624561)
Supplement: NIHMS723960-supplement-2.pdf [file NIHMS723960-supplement-2.pdf]

**Supplementary Table 1.** Participant clinical characteristics.

|                             | Healthy<br>Controls<br>( <i>n</i> = 21) | Anorexia<br>Nervosa<br>( <i>n</i> = 21) |          |                 |          |
|-----------------------------|-----------------------------------------|-----------------------------------------|----------|-----------------|----------|
|                             | Mean ± SD                               | Mean ± SD                               | <i>t</i> | <i>df</i>       | <i>P</i> |
| Age (years)                 | 22.7±3.1                                | 26.1±6.5                                | -2.1     | 40              | 0.04     |
| BMI (kg/m <sup>2</sup> )    | 21.5±1.9                                | 15.7±2.0                                | 9.5      | 40              | <0.0001  |
| <b>Subtype</b>              |                                         |                                         |          |                 |          |
| Restricting / Binge-purge   |                                         | <i>n</i> = 10 / 11                      |          |                 |          |
| Duration of illness (years) | –                                       | 11.4±6.7                                |          |                 |          |
| Education (years)           | 15.7±2.3                                | 14.4±2.5                                | 1.7      | 40              | 0.10     |
| EDE-Q, Global Score         | 0.11±0.11                               | 4.0±1.6                                 | -10.7    | 20 <sup>†</sup> | <0.0001  |
| TFEQ-R                      | 5.2±2.8                                 | 16.3±4.0                                | -10.3    | 40              | <0.0001  |
| STAI-S                      | 26.4±4.6                                | 64.1±11.5                               | -13.6    | 26 <sup>†</sup> | <0.0001  |
| POMS depression             | 0.8±1.4                                 | 39.3±13.9                               | -12.6    | 20 <sup>†</sup> | <0.0001  |
| <b>Multi-Item Meal</b>      |                                         |                                         |          |                 |          |
| Intake (kcal)               | 831±278                                 | 312±254                                 | 5.9      | 36              | <0.0001  |
| Fat intake (% kcal)         | 37.2±6.5                                | 16.5±10.2                               | 7.3      | 26 <sup>†</sup> | <0.0001  |

BMI = Body Mass Index, WTAR = Weschler Test of Adult Reading, EDE-Q = Eating Disorder Examination Questionnaire, TFEQ-R = Three Factor Eating Questionnaire, Restraint Scale, STAI-S = Spielberger Anxiety Index, State version; POMS = Profile of Mood States

†Levene's test indicated unequal variances, so degrees of freedom were adjusted accordingly.

**Supplementary Table 2.** Food task stimuli.

|    | <b>Low fat foods</b>     | <b>High fat foods</b>   |
|----|--------------------------|-------------------------|
| 1  | 1% milk                  | American cheese         |
| 2  | air-popped popcorn       | avocado                 |
| 3  | apple slices             | baby cheese             |
| 4  | baked potato             | bagel and cream cheese  |
| 5  | banana                   | baguette with olive oil |
| 6  | broccoli and cauliflower | brownie                 |
| 7  | celery and carrot sticks | burger                  |
| 8  | cherries                 | cheese nachos           |
| 9  | cherry tomatoes          | chicken nuggets         |
| 10 | corn on the cob          | cookies                 |
| 11 | cucumber slices          | cupcakes                |
| 12 | Froot loops (with milk)  | doughnuts               |
| 13 | grapes                   | eggs                    |
| 14 | green beans              | french fries            |
| 15 | grilled chicken strips   | fried eggs              |
| 16 | kiwis                    | granola (with milk)     |
| 17 | lollipops                | grilled cheese sandwich |
| 18 | mushrooms                | Hershey Kisses          |
| 19 | orange slices            | hotdog with mustard     |
| 20 | peaches                  | ice cream sundae        |
| 21 | pickles                  | M&Ms                    |
| 22 | plain bagel              | mac and cheese          |
| 23 | pretzels                 | mashed potato           |
| 24 | raisin bran with milk    | mini muffins            |
| 25 | raisins                  | mozzarella sticks       |
| 26 | rice cakes               | peanut butter           |
| 27 | rigatoni                 | pizza                   |
| 28 | rigatoni and sauce       | Reese's pieces          |
| 29 | Saltines                 | Ritz crackers           |
| 30 | seaweed                  | salad with chicken      |
| 31 | skim milk                | steak                   |
| 32 | vegetable soup           | string cheese           |
| 33 | Sour patch candies       | tacos                   |
| 34 | soy chips                | trail mix               |
| 35 | strawberries             | humus and pita          |
| 36 | sushi rolls              | whole milk              |
| 37 | turkey sandwich          | popcorn                 |
| 38 | yogurt                   | yogurt covered pretzels |

**Supplementary Table 3** (see also **Fig. 2**). Results from the whole-brain parametric analysis of choice ratings ( $P < 0.05$ , corrected,  $n = 42$ ).

|                          | Cluster | Region                              | Cluster size | x   | y   | z    | Peak Z |
|--------------------------|---------|-------------------------------------|--------------|-----|-----|------|--------|
| HC                       | 1       | R Cerebellum                        | 17704        | 18  | -50 | -20  | 5.78   |
|                          |         | R Cerebellum                        |              | 26  | -50 | -22  | 5.58   |
|                          |         | R Occipital fusiform gyrus          |              | 34  | -74 | -10  | 5.33   |
|                          |         | R Temporal occipital fusiform gyrus |              | 24  | -50 | -16  | 5.3    |
|                          |         | R Occipital fusiform gyrus          |              | 26  | -70 | -18  | 4.79   |
|                          |         | R Lingual gyrus                     |              | 12  | -78 | -14  | 4.75   |
|                          | 2       | L Postcentral gyrus                 | 6607         | -50 | -20 | 58   | 6.34   |
|                          |         | L Precentral gyrus                  |              | -34 | -20 | 62   | 5.92   |
|                          |         | L Precentral gyrus                  |              | -32 | -24 | 56   | 5.83   |
|                          |         | L Precentral gyrus                  |              | -40 | -22 | 68   | 5.76   |
|                          |         | L Postcentral gyrus                 |              | -40 | -26 | 68   | 5.66   |
|                          |         | L Precentral gyrus                  |              | -40 | -20 | 54   | 5.66   |
|                          | 3       | L Frontal medial cortex             | 3203         | -10 | 52  | -6   | 4.96   |
|                          |         | L Frontal pole                      |              | -6  | 60  | 0    | 4.88   |
|                          |         | L Frontal pole                      |              | -6  | 60  | 10   | 4.64   |
|                          |         | R Anterior cingulate gyrus          |              | 2   | 36  | 14   | 4.49   |
|                          |         | R Paracingulate gyrus               |              | 10  | 48  | -8   | 4.19   |
|                          |         | L Anterior cingulate gyrus          |              | -2  | 40  | 6    | 4.11   |
|                          | 4       | L Superior frontal gyrus            | 548          | -18 | 26  | 48   | 3.72   |
|                          |         | L Superior frontal gyrus            |              | -22 | 34  | 36   | 3.52   |
|                          |         | L Superior frontal gyrus            |              | -18 | 36  | 46   | 3.3    |
| L Superior frontal gyrus |         | -20                                 |              | 30  | 44  | 3.2  |        |
| L Superior frontal gyrus |         | -20                                 |              | 26  | 40  | 3.14 |        |
| L Superior frontal gyrus |         | -20                                 |              | 26  | 34  | 3.13 |        |
| AN                       | 1       | L Precentral gyrus                  | 7933         | -36 | -24 | 48   | 6.39   |
|                          |         | L Precentral gyrus                  |              | -40 | -20 | 56   | 6.3    |
|                          |         | L Precentral gyrus                  |              | -42 | -14 | 64   | 6.13   |
|                          |         | L Precentral gyrus                  |              | -34 | -20 | 70   | 6      |
|                          |         | L Postcentral gyrus                 |              | -46 | -18 | 60   | 5.86   |
|                          |         | L Postcentral gyrus                 |              | -50 | -24 | 62   | 5.46   |
|                          | 2       | L Frontal medial cortex             | 4551         | -6  | 50  | -6   | 4.75   |
|                          |         | L Frontal pole                      |              | -2  | 60  | 0    | 4.54   |
|                          |         | R Frontal medial cortex             |              | 4   | 50  | -14  | 4.38   |
|                          |         | L Frontal orbital cortex            |              | -20 | 28  | -20  | 4.05   |
|                          |         | R Paracingulate gyrus               |              | 10  | 46  | -4   | 4.04   |
|                          |         | R Caudate                           |              | 12  | 26  | -6   | 4.04   |
|                          | 3       | R Cerebellum                        | 2962         | 14  | -52 | -14  | 5.71   |
|                          |         | R Cerebellum                        |              | 20  | -54 | -22  | 5.51   |

|       |   |                                      |      |     |      |      |      |
|-------|---|--------------------------------------|------|-----|------|------|------|
|       |   | R Lingual / Occipital fusiform gyrus | 20   | -66 | -14  | 5.4  |      |
|       |   | R Cerebellum                         | 26   | -48 | -30  | 4.92 |      |
|       |   | R Lingual gyrus                      | 12   | -66 | -6   | 4.47 |      |
|       |   | R Lingual gyrus                      | 12   | -72 | -10  | 4.28 |      |
| 4     |   | L Precuneus                          | 1020 | -8  | -58  | 8    | 3.68 |
|       |   | L Precuneus                          |      | -2  | -58  | 22   | 3.49 |
|       |   | L Posterior cingulate gyrus          |      | -2  | -50  | 16   | 3.44 |
|       |   | Posterior cingulate gyrus            |      | 0   | -38  | 4    | 3.24 |
|       |   | L Precuneus                          |      | -4  | -64  | 20   | 3.18 |
|       |   | L Precuneus                          |      | -8  | -76  | 38   | 3.09 |
| 5     |   | L Supplementary motor cortex         | 762  | -2  | -12  | 48   | 3.73 |
|       |   | L Superior frontal gyrus             |      | -28 | 24   | 56   | 3.41 |
|       |   | Superior frontal gyrus               |      | 0   | 20   | 50   | 3.3  |
|       |   | L Superior frontal gyrus             |      | -20 | 26   | 58   | 3.24 |
|       |   | L Middle frontal gyrus               |      | -32 | 14   | 58   | 3.16 |
|       |   | L Anterior cingulate gyrus           |      | -8  | 0    | 44   | 3.06 |
| 6     |   | R Cerebellum                         | 644  | 14  | -66  | -48  | 4.87 |
|       |   | R Cerebellum                         |      | 18  | -64  | -48  | 4.83 |
|       |   | R Cerebellum                         |      | 26  | -60  | -52  | 4.51 |
|       |   | R Cerebellum                         |      | 26  | -56  | -46  | 4.38 |
|       |   | R Cerebellum                         |      | 30  | -50  | -50  | 3.7  |
|       |   | R Cerebellum                         |      | 4   | -70  | -34  | 3.4  |
| HC>AN | 1 | R Occipital fusiform gyrus           | 5792 | 34  | -74  | -8   | 4.92 |
|       |   | L Temporal occipital fusiform gyrus  |      | -30 | -50  | -8   | 4.48 |
|       |   | R Lingual gyrus                      |      | 2   | -88  | -14  | 4.43 |
|       |   | L Occipital pole                     |      | -12 | -104 | 12   | 4.42 |
|       |   | R Lingual gyrus                      |      | 12  | -86  | -18  | 4.38 |
|       |   | R Occipital pole                     |      | 22  | -88  | 30   | 4.29 |

AN>HC

No significant clusters

For each cluster, the peak and 5 local maxima within the cluster are listed along with x-y-z locations in MNI space.

**Supplementary Table 4** (see also **Fig. 3**). Results from the PPI analysis of connectivity for high versus low-fat foods between caudate and PFC including age as a covariate ( $P < 0.05$ , TFCE corrected,  $n = 42$ ).

|       | Cluster                 | Region                                | Cluster size | x  | y  | z  | Peak $P$ |
|-------|-------------------------|---------------------------------------|--------------|----|----|----|----------|
| HC>AN | 1                       | L Paracingulate gyrus                 | 617          | -4 | 48 | 22 | 0.019    |
|       | 2                       | L Paracingulate gyrus                 | 146          | -2 | 22 | 44 | 0.022    |
|       | 3                       | R Frontal pole / Middle frontal gyrus | 134          | 42 | 48 | 0  | 0.009    |
|       | 4                       | R Frontal pole / Middle frontal gyrus | 27           | 24 | 40 | 24 | 0.032    |
|       | 5                       | R Frontal pole / Middle frontal gyrus | 13           | 46 | 34 | 26 | 0.046    |
| AN>HC | No significant clusters |                                       |              |    |    |    |          |

Clusters containing more than 10 voxels are shown.

Whole-brain analyses revealed no clusters outside the PFC (FWE-corrected  $P < 0.05$ , cluster-forming threshold  $Z > 2.3$ ).
